# Supplementary material for: Alteration of the cellulose nanocrystal surface chemistry for guided formation of polymer brushes
Source: Royal Society of Chemistry journal article supplement (doi:10.1039/d3py00043e), 2023-01-01
Supplement: d3py00043e1.pdf [file d3py00043e1.pdf]

# Alteration of the cellulose nanocrystal surface chemistry for guided formation of polymer brush

## Supporting Information

*Lauren Geurds, Katarzyna Kępa, Jan Lauko, Alan E. Rowan and Nasim Amiralian*

Australian Institute of Bioengineering and Nanotechnology (AIBN), University of Queensland, Brisbane, Queensland, Australia

### Contents:

|           |                                                                                           |    |
|-----------|-------------------------------------------------------------------------------------------|----|
| Figure S1 | CNC-BiBB discoloration and physical appearance                                            | S2 |
| Figure S2 | FTIR CNC-BiBB                                                                             | S2 |
| Figure S3 | <sup>13</sup> C NMR CNC-BiBB                                                              | S3 |
| Figure S4 | Thermogravimetric analysis CNC-BiBB                                                       | S3 |
| Figure S5 | XRD CNC-BiBB                                                                              | S4 |
| Figure S6 | CNC-BiBB reaction discoloration due to base                                               | S4 |
| Figure S7 | <sup>1</sup> H NMR spectroscopy wash                                                      | S5 |
| Figure S8 | Thermogravimetric analysis for CNC and CNC grafted PtBA systems                           | S6 |
| Table S1  | Thermogravimetric analysis of CNC and CNC grafted PtBA systems decomposition temperatures | S6 |

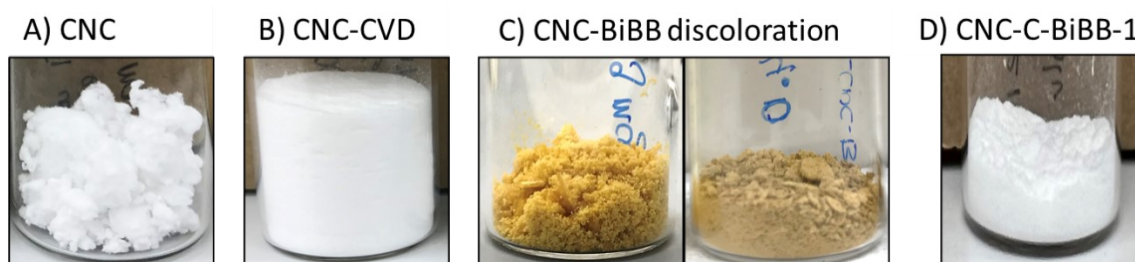

Figure S1, Samples of A) unmodified CNCs, B) CNC-CVD, C) CNC-BiBB discolored, and D) CNC-C-BiBB-1 after freeze-drying.

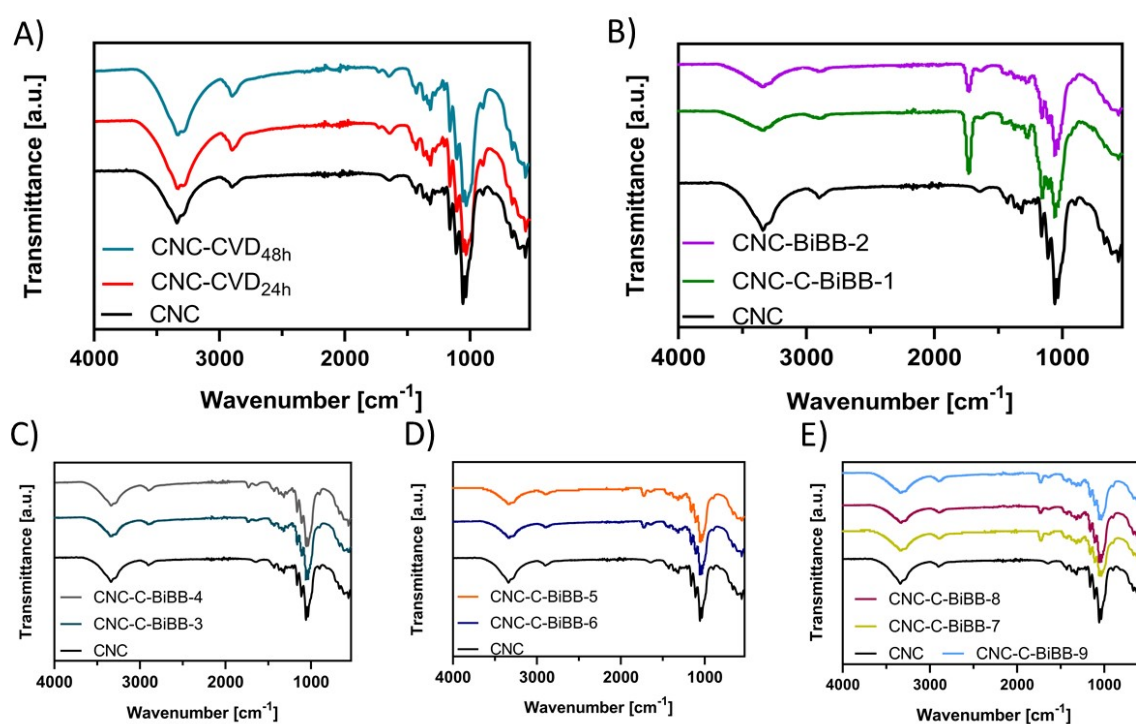

Figure S2, FT-IR spectra of CNC (Black) and ATRP initiator modified samples A) CNC-CVD 24 and 48 h. B) CNC-C-BiBB-1 and CNC-BiBB-2. C) CNC-C-BiBB-3 and -4. D) CNC-C-BiBB-5 and -6. E) CNC-C-BiBB-7, -8, and 9.

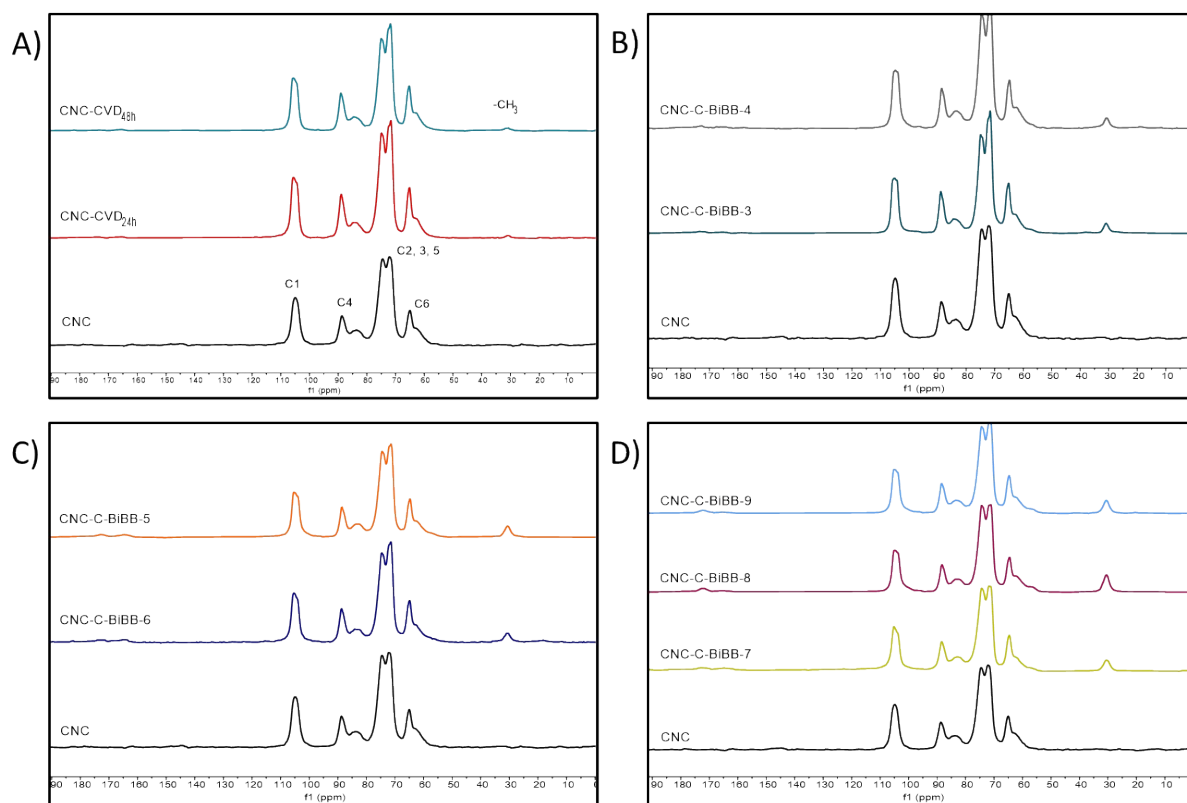

Figure S3,  $^{13}\text{C}$  NMR of CNC (Black) and ATRP initiator modified samples A) CNC-CVD 24 and 48 h. B) CNC-C-BiBB-3 and -4. C) CNC-C-BiBB-5 and -6. D) CNC-C-BiBB-7, -8, and 9.

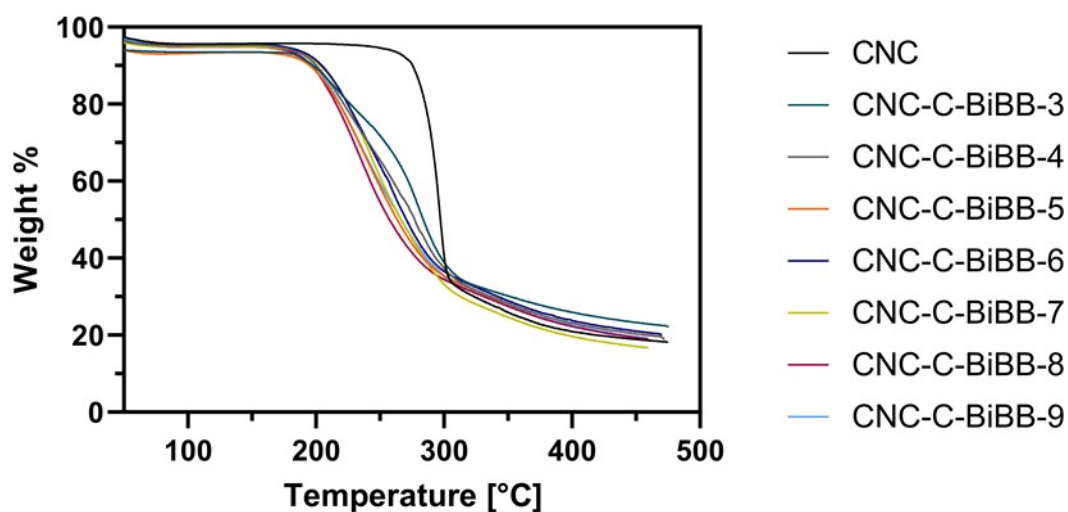

Figure S4, Thermogravimetric analysis for unmodified CNC (Black) and ATRP initiator-modified samples CNC-C-BiBB-3 to 9. Inset represents the samples decomposition area for all samples represented.

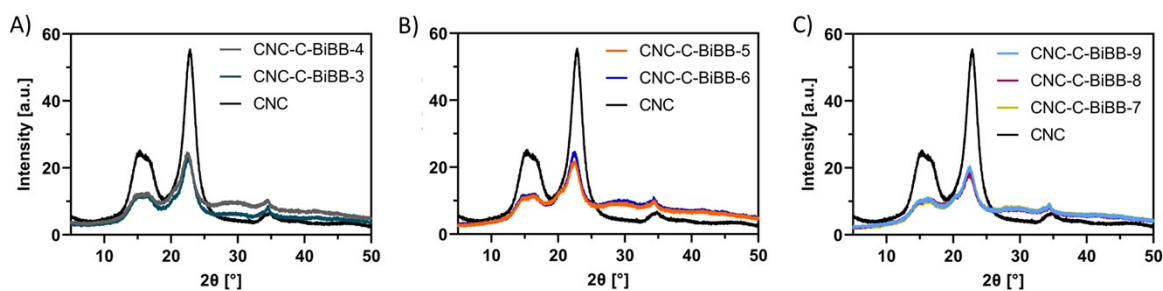

Figure S5, XRD profiles of unmodified CNC (Black) and ATRP initiator modified samples A) CNC-C-BiBB-3 and -4. B) CNC-C-BiBB-5 and -6. C) CNC-C-BiBB-7, -8, and 9. Depending on the treatment conditions, the modified CNC particles exhibit peaks consistent with cellulose I morphology.

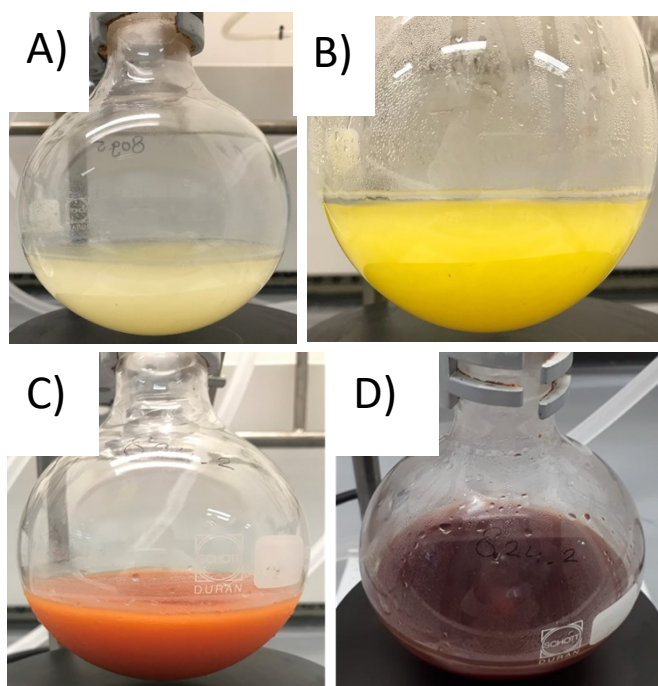

Figure S6, The discoloration reaction mixture of CNC-CVD, BiBB, and pyridine in DMF in which the amount of pyridine was changed. CNC-C-BiBB-6 A) start of the reaction, B) after 48 hours. CNC-C-BiBB-5 C) start of the reaction, D) after 48 hours.

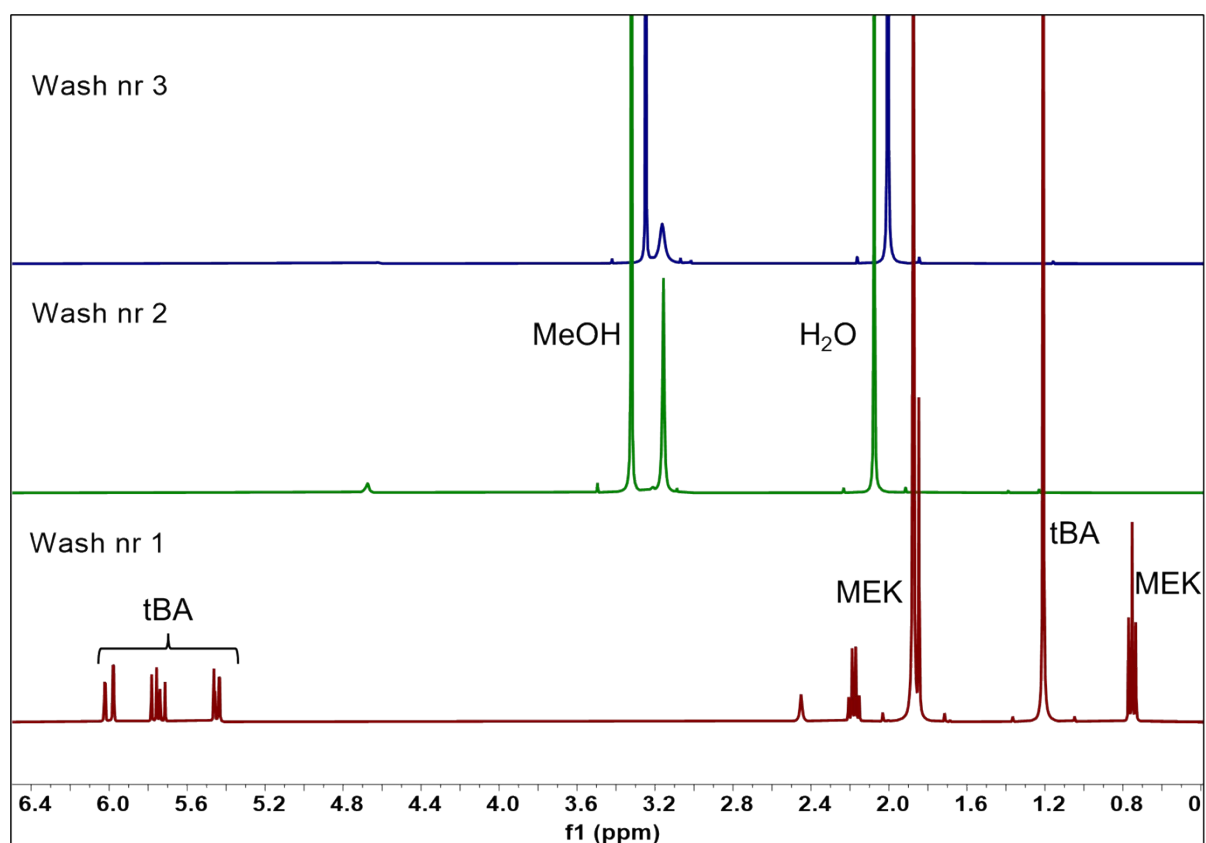

Figure S7, <sup>1</sup>H NMR spectra of the washed layers in CDCl<sub>3</sub> for SI-ATRP of tBA on CNC-C-BiBB-5 (CNC-PtBA1).

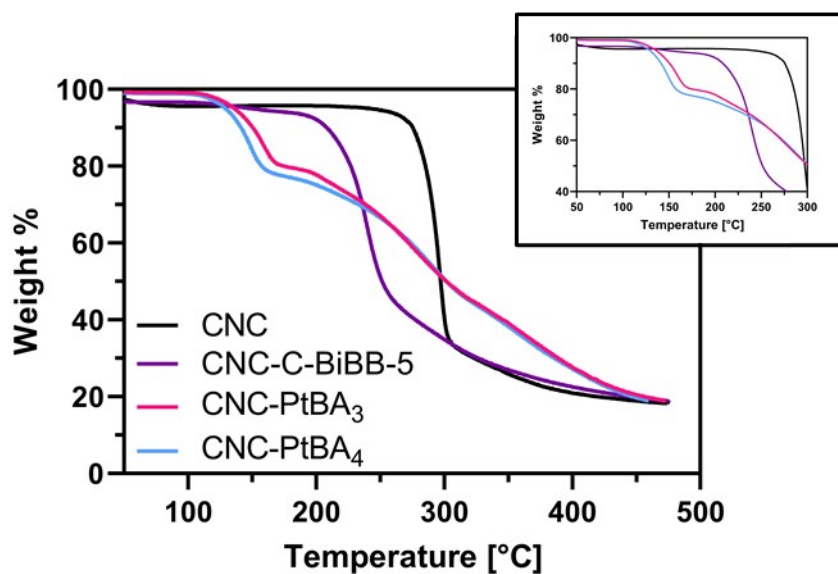

Figure S8, Thermogravimetric analysis for unmodified CNC (Black), CNC-C-BiBB-5 (Green), CNC-PtBA<sub>3</sub> (Pink) and CNC-PtBA<sub>4</sub> (Blue). Inset represents the samples decomposition area for all samples represented.

Table S1: Thermogravimetric analysis of decomposition temperatures

| Sample                | Reaction conditions |        |      | Results                 |                       |
|-----------------------|---------------------|--------|------|-------------------------|-----------------------|
|                       | DS                  | Eq tBA | Time | T <sub>onset</sub> [°C] | T <sub>max</sub> [°C] |
| CNC                   |                     |        |      | 260                     | 296                   |
| CNC-C-BiBB-3          |                     |        |      | 202                     | 220                   |
| CNC-PtBA <sub>1</sub> | 7.0%                | 1000   | 15 h | 182                     | 200                   |
| CNC-PtBA <sub>2</sub> | 10%                 | 500    | 6 h  | 176                     | 188                   |
| CNC-PtBA <sub>3</sub> | 7.5%                | 1000   | 4 h  | 137                     | 183                   |
| CNC-PtBA <sub>4</sub> | 10 %                | 250    | 2 h  | 129                     | 149                   |
